# Supplementary material for: The molecular logic of Nanog-induced self-renewal in mouse embryonic stem cells
Source: PubMed Central journal article supplement (PMC6406003; doi:10.1038/s41467-019-09041-z), 2019-03-07
Supplement: 41467_2019_9041_MOESM2_ESM.pdf [file 41467_2019_9041_MOESM2_ESM.pdf]

## **Description of Additional Supplementary Files**

File Name: Supplementary Data 1

Description: Primer and gRNA sequences as well as antibodies information.

File Name: Supplementary Data 2

Description: Global statistics of our sequencing data.
